1

*Manuscript Submitted to Journal of Experimental Biology*

2

**Title: Skeletal muscle ceramides do not contribute to physical inactivity-induced insulin resistance**

3

4

**Running Title: Ceramides do not cause inactivity-related insulin resistance**

5

**Authors:** Zephyra Appriou<sup>1</sup>, Kévin Nay<sup>1</sup>, Nicolas Pierre<sup>2</sup>, Dany Saligaut<sup>1</sup>, Luz Lefevre-Orfila<sup>1</sup>, Brice Martin<sup>1</sup>, Thibault Cavey<sup>3,4</sup>, Martine Ropert<sup>3,4</sup>, Olivier Loréal<sup>3</sup>, Françoise Rannou-Bekono<sup>1</sup>, Frédéric Derbré<sup>1</sup>

6

7

8

9

**Affiliation:**

<sup>1</sup>Laboratory “Movement Sport and health Sciences”, University of Rennes -ENS Rennes, Bruz, France

<sup>2</sup>GIGA-R - Translational Gastroenterology, Liège University, Belgium

<sup>3</sup>INSERM NuMeCan UMR 1274, CIMIAD, France, Faculty of Medicine, University of Rennes, Rennes, France

<sup>4</sup>Laboratory of Biochemistry, University Hospital Pontchaillou, Rennes, France

15

16

**Address correspondence to:**

17

Frédéric Derbré, Assistant professor, PhD (Corresponding author)

18

Laboratory “Movement Sport and Health Sciences”, University of Rennes -ENS Rennes

19

Av. Robert Schuman – Campus Ker-Lann

20

35170 Bruz - France

21

Phone: (33) 290091587

22

Email: frederic.derbre@univ-rennes2.fr

23

24

**Conflict of interest:** The authors declare that no conflict of interest exists.

25

**Key Words:** NF-KB, HOMA-IR, AMP kinase, Akt, triglycerides

26

27 **SUMMARY STATEMENT**

28 This study supports that muscle ceramide do not play a key role in insulin resistance which developed  
29 early with physical inactivity.

30

31 **ABSTRACT**

32 Physical inactivity increases the risk to develop type 2 diabetes, a disease characterized by a state of  
33 insulin resistance. By promoting inflammatory state, ceramides are especially recognized to alter  
34 insulin sensitivity in skeletal muscle. The present study was designed to analyze, in mice, whether  
35 muscle ceramides contribute to physical inactivity-induced insulin resistance. For this purpose, we  
36 used the wheel lock model to induce a sudden reduction of physical activity, in combination with  
37 myriocin treatment, an inhibitor of *de novo* ceramide synthesis. Mice were assigned to 3 experimental  
38 groups: voluntary wheel access group (Active), a wheel lock group (Inactive) and wheel lock group  
39 treated with myriocin (Inactive-Myr). We observed that 10 days of physical inactivity induces  
40 hyperinsulinemia and increase HOMA-IR. The muscle ceramide content were not modified by  
41 physical inactivity and myriocin. Thus, muscle ceramides do not play a role in physical inactivity-  
42 induced insulin resistance. In skeletal muscle, insulin-stimulated Akt phosphorylation and  
43 inflammatory pathway were not affected by physical inactivity whereas a reduction of GLUT4 content  
44 was observed. Based on these results, physical inactivity-induced insulin resistance seems related to a  
45 reduction in GLUT4 content rather than defects in insulin signaling. We observed in inactive mice that  
46 myriocin treatment improved glucose tolerance, insulin-stimulated Akt, AMPK activation and GLUT4  
47 content in skeletal muscle. Such effects occur regardless of changes in muscle ceramide content. These  
48 findings highlight that myriocin could be a promising drug to improve glucose tolerance and insulin  
49 sensitivity.

## 50 INTRODUCTION

51 Physical inactivity is now recognized as a global pandemic promoting the development of numerous  
52 chronic diseases including coronary heart diseases, type 2 diabetes, cancer or dementia (Booth et al.,  
53 2017; Pedersen, 2009). Each year, non-communicable chronic diseases kill 36 million people  
54 worldwide, including 17.3 million of deaths due to cardiovascular diseases and 1.3 million due to  
55 diabetes (Lee et al., 2012). Nine million of these deaths occur before 60 years old, while over 5.3  
56 million deaths could be averted every year if all inactive people performed only 15 to 30 min/day of  
57 moderate physical exercise (Lee et al., 2012). In addition to morbidity and premature mortality, the  
58 economic burden of physical inactivity for national governments is estimated worldwide to 53.8  
59 billion US dollars for health-care systems, and 13.7 billion US dollars for productivity losses (Ding et  
60 al., 2016).

61 For the World Health Organization, a person is considered as physically inactive if he doesn't meet  
62 any of these 3 criteria: 30 min of moderate-intensity physical activity on at least 5 days every week, 20  
63 min of vigorous-intensity physical activity on at least 3 days every week, or an equivalent combination  
64 achieving 600 metabolic equivalent (MET)-min per week (Hallal et al., 2012). Two main experimental  
65 approaches are used to understand the metabolic disorders related to this deleterious behavior (Pierre  
66 et al., 2016): 1) physical inactivity, induced by the reduction of the daily number of steps performed  
67 (from 10000 to less than 5000) in humans (Knudsen et al., 2012; Krogh-Madsen et al., 2010; Reynolds  
68 et al., 2015) and the wheel locked model in rodents (Roberts et al., 2012); 2) immobilization, induced  
69 by hindlimb unloading in rodents and bed rest in humans. Even if the latter represents an interesting  
70 approach to explore metabolic changes occurring with dramatic reduction of skeletal muscle activity  
71 (Bergouignan et al., 2011), it can be considered as too extreme compared to what physically inactive  
72 people really experience (Pierre et al., 2016; Roberts et al., 2012). In the present study, we thus choose  
73 the wheel lock model to study physical inactivity in mice.

74 The physiological mechanisms responsible for the development of chronic diseases related to physical  
75 inactivity has been deeply explored during the last decade (Booth et al., 2017; Gratas-Delamarche et  
76 al., 2014; Pedersen, 2009; Pierre et al., 2016). Among the proposed mechanisms, insulin resistance  
77 associated to chronic hyperinsulinemia is considered as a key triggering event promoting lipid storage  
78 and obesity (Softic et al., 2012; Stumvoll et al., 2000), but also tumor growth and cancer (Tsujimoto et  
79 al., 2017). Insulin resistance is clinically defined as the inability of a known quantity of exogenous or  
80 endogenous insulin to increase glucose uptake and utilization. In humans, several studies reported that  
81 a sudden reduction of physical activity causes whole-body insulin resistance after only few days  
82 (Knudsen et al., 2012; Krogh-Madsen et al., 2010; Reynolds et al., 2015). In this context, the drastic  
83 reduction of energy expenditure rapidly occurring in skeletal muscle is currently considered as the  
84 primary event promoting insulin resistance (Booth et al., 2017). The related gain of fat mass and the  
85 chronic low grade inflammatory state observed in inactive people are generally proposed as

86 responsible for insulin resistance development (Booth et al., 2017; Pedersen, 2009). However, insulin  
87 resistance occurs after few days of physical inactivity whereas systemic inflammatory markers (e.g.  
88 TNF- $\alpha$ , IL-6) or visceral fat mass generally increase after several weeks in both humans and rodent  
89 experiments (Hamburg et al., 2007; Krogh-Madsen et al., 2010; Olsen et al., 2008; Rector et al.,  
90 2008). Thus, adipose tissue and inflammation processes do not appear to be the culprits of early  
91 insulin resistance.

92 Physical inactivity, whatever the experimental model, induces a shift in fuel metabolism in favor of  
93 carbohydrate oxidation and in detriment of lipid oxidation, resulting in an accumulation of  
94 intramuscular lipids (Bergouignan et al., 2006; Laye et al., 2009; Momken et al., 2011). Lipid  
95 accumulation in skeletal muscle is well known to be related with insulin resistance, especially due to  
96 their conversion into ceramides (Samuel and Shulman, 2012). Ceramides are bioactive mediators  
97 involved in cell responses to stress, and their increase in skeletal muscle is known to induce insulin  
98 resistance through the inhibitory phosphorylation of proteins of the insulin pathway including insulin  
99 receptor substrate-1/2 (IRS1/2) and phosphatidylinositol-3-kinase, (PI3-kinase) (Chavez and  
100 Summers, 2003). Ceramides are synthesized through both stimulation of sphingomyelinase-mediated  
101 hydrolysis of membrane sphingomyelin, and *de novo* synthesis pathway consisting of the condensation  
102 of palmitoyl-CoA with serine (Hannun and Luberto, 2000). Whereas accumulation of intramuscular  
103 ceramides has been extensively explored in the context of obesity (Schmitz-Peiffer, 2010; Ussher et  
104 al., 2010), their role in the onset of insulin resistance related to physical inactivity remains poorly  
105 understood.

106 We hypothesized that physical inactivity rapidly increases ceramide synthesis in skeletal muscle,  
107 which in turn would induce insulin resistance. Therefore, the present study was designed to analyze, in  
108 mice, whether inhibition of ceramide synthesis prevents insulin resistance observed after a short period  
109 of physical inactivity. For this purpose, we used: 1) the wheel lock model to study the effect of  
110 physical inactivity; 2) myriocin, an inhibitor of *de novo* synthesis of ceramides (Salaun et al., 2016).

111

## 112 **MATERIAL AND METHODS**

113 All procedures described below were approved by the French Ministry of Higher Education and  
114 Research in accordance with the local committee on Ethics in Research of Rennes (veterinary service  
115 of health and animal protection, authorization 01259.03).

116 *Animal care and protocol.* To mimic the effects of physical inactivity in mice, we used the wheel lock  
117 model first developed by Frank Booth's research group (Roberts et al., 2012). Twenty-two male  
118 C57BL/6 mice were obtained at weaning (3 weeks) and allowed to acclimatize for 1 week. The  
119 animals were housed in temperature controlled room ( $21 \pm 2^\circ\text{C}$ ) with a 12-h:12-h light/dark cycle and  
120 received standard rodent chow and water *ad libitum*. After 1 week, mice were separated into individual  
121 cages all equipped with a voluntary running wheel outfitted with a lap counter (IntelliBio, Nancy,

122 France). Food intake and covered distance were daily noticed whereas body weight was recorded  
123 every week. The distance daily covered increased the first two weeks and remained unchanged during  
124 the next 4 weeks. At the end of this period, mice were assigned to 3 experimental groups with equal  
125 mean and standard deviation for daily covered distance: voluntary wheel access group (Active, n=7), a  
126 wheel lock group (Inactive, n=7) and wheel lock group treated with myriocin (Inactive-Myr, n=8).  
127 Myriocin was daily injected (0.3 mg/kg, i.p) as previously described (Hojjati et al., 2005; Lee et al.,  
128 2010). In the same schedule, Active and Inactive groups received saline vehicle. After 10 days of  
129 physical inactivity, mice were sacrificed in an overnight fasting state. Mice were anesthetized with a  
130 ketamine-xylazine-butorphanol cocktail. Adipose tissue, *rectus femoris* (RF) and right *tibialis anterior*  
131 (TA) muscles were removed, and then immediately frozen in liquid nitrogen. Left *tibialis anterior*  
132 muscles were removed, and then submitted to an *ex vivo* insulin sensitivity test. Immediately following  
133 tissue harvest, mice were euthanized via exsanguination of the heart. Intracardiac blood was collected  
134 into dry tubes and centrifuged (1,500 g, 10 min) for serum sampling.

135 *Glucose tolerance assessment.* Oral glucose tolerance test (OGTT) was performed on the morning one  
136 day before sacrifice. Mice were fasted for 6h before the test. Then, glucose was administrated by oral  
137 gavage (1 g/kg body weight). Glucose values were obtained at rest and 15, 30, 45, 60, 90, 120 min  
138 after glucose gavage from tail blood samples. Glucose level was determined using a glucose meter  
139 (Freestyle Papillon Vision). Wheels were locked during the whole time of fasting and OGTT.

140 *Ex vivo muscle insulin sensitivity test.* As previously described (Tardif et al., 2011), left *tibialis*  
141 *anterior* muscles were longitudinally divided in two strips (20-25 mg) and each strip was pre-  
142 incubated for 30 min in 3 mL of modified Krebs Ringer buffer (120 mM NaCl, 4.8 mM KCl, 25 mM  
143 NaHCO<sub>3</sub>, 2.5 mM CaCl<sub>2</sub>, 1.24 mM NaH<sub>2</sub>PO<sub>4</sub>, 1.25 mM MgSO<sub>4</sub>, 8 mM D-Glucose, 2 mM sodium  
144 pyruvate, 2 mM HEPES, pH 7.4) saturated with a 95% O<sub>2</sub> and 5% CO<sub>2</sub> mix at 37°C under stirring.  
145 One of the two strips was stimulated with 20 nM insulin for 30 minutes, then muscle samples were  
146 frozen in liquid nitrogen until analysis. Muscle insulin sensitivity was assessed by measuring the  
147 phosphorylation state of Akt on serine 473, an intermediate of the insulin pathway.

148 *Serum parameters.* Glucose concentration was performed using Automated Beckman Coulter  
149 (Beckman Coulter, Brea, CA). Serum insulin concentrations were measured by enzyme-linked  
150 immunosorbent assay (ELISA) according to manufacturer's instructions (Millipore, St Louis, MO,  
151 USA). Insulin sensitivity was determined by calculating HOMA-IR according to the following  
152 formula (Matthews et al., 1985):  $HOMA-IR = [fasting\ glucose\ (mmol/l)] \times [fasting\ insulin\ (\mu U/ml)] / 22.5$ .  
153

154 *Quantification of muscle triglycerides.* Muscle triglycerides were determined by using DiaSys kit  
155 (Diagnostic System, Grabels, France) following a preliminary organic phase extraction according to  
156 Bligh & Dyer's method (Bligh and Dyer, 1959). Briefly, 30 mg of right *tibialis anterior* samples were

157 crushed with 300  $\mu\text{L}$  of 150 mM sodium chloride. Then 150  $\mu\text{L}$  of muscle homogenates were  
158 extracted with 600  $\mu\text{L}$  of a methanol-chloroform mixture (1:1, v/v). The organic layers were collected  
159 after centrifugation (10,000g for 10 min) and dried under nitrogen. Dry samples were reconstituted in  
160 37.5  $\mu\text{L}$  of isopropanol/acetonitrile/water mixture (2:1:1, v/v/v) and 10  $\mu\text{L}$  were analyzed according to  
161 the manufacturer recommendations.

162 *Quantification of muscle sphingolipids and ceramides.* Sphingolipids were extracted from  $\approx$  30 mg of  
163 homogenized *tibialis anterior* muscles using acidified cyclohexane/isopropanol mixture (60:40, v/v,  
164 0.1% formic acid) and purified on  $\text{NH}_2$  SPE cartridges (silica gel cartridges, 100 mg) to obtain distinct  
165 fractions of ceramides and sphingomyelins (Bodennec et al., 2000). The sphingolipid fractions were  
166 then quantified by UHPLC-ESI-MS/MS using an Acquity H-Class UHPLC system (Waters, Milford,  
167 MA) combined with a Waters Xevo TQD triple quadrupole mass spectrometer. Lipid extracts were  
168 injected onto a C18 BEH column (2.1 mm x 50.0 mm, 1.7- $\mu\text{m}$  particles; Waters) held to 43°C to  
169 separate all species of ceramides and sphingomyelins with two different LC elution gradients. For  
170 ceramide species separation, the gradient started at 95% of eluent B (mobile phase of water and of  
171 methanol with 1% formic acid and 5 mM ammonium formate), up to 98% in 4 min, then rapidly  
172 decreased to 95% for 0.1 min, and was maintained for 2 min. For sphingomyelin species separation,  
173 the gradient started at 95% of eluent B, up to 99% for 6 min, then rapidly decreased to 95% for 0.1  
174 min, and was maintained for 1.4 min. Multiple reaction-monitoring mode in positive electrospray  
175 ionization was used to quantify each species of ceramides and sphingomyelins. The source heater  
176 temperature hold at 150°C, and the capillary voltage was set at 3.2 kV. The flow rate of desolvation  
177 gas was of 650 l/h at 350°C, and the cone voltage varied from 26–58 V. Argon was used as the  
178 collision gas, and collision energies varied from 12–40 eV. Data analyses were performed by Mass  
179 Lynx software version 4.1 (Waters, Manchester, UK). Sphingolipid quantification was possible with  
180 calibration curves constructed by plotting the peak area ratios of analyses to the respective internal  
181 standard against concentration using a linear regression model. The quantification measurements were  
182 performed using the TargetLinks software (Waters).

183 *RNA extraction and quantitative real-time PCR.* Total RNA extraction from frozen *rectus femoris* was  
184 performed with Trizol® (Invitrogen, France) according to the manufacturer's instructions. The RNA  
185 quality and quantity were assessed by FlashGel DNA System® and Nanodrop® spectrophotometry,  
186 respectively. Reverse transcription was performed on a T100 Thermal Cycler (Bio-Rad) with iScript™  
187 cDNA synthesis kit (Bio-Rad) from 1  $\mu\text{g}$  total RNA. Real time PCR experiments were done on a  
188 CFX96 Real Time System (Bio Rad). Samples were analyzed in duplicate in 10  $\mu\text{l}$  reaction volume  
189 containing 4.8  $\mu\text{l}$  IQ™ Sybr® GreenSuperMix (Bio-Rad), 0.1  $\mu\text{l}$  of each primer (100 nM final) and 5  $\mu\text{l}$   
190 of diluted cDNA. The following primer sequences were used: GLUT4: (F:  
191 GCCTGCCCGAAAGAGTCTAA and R: CATTGATGCCTGAGAGCTGTTG); PPIA (F:  
192 CGTCTCCTTCGAGCTGTTG and R: CCACCCTGGCACATGAATC); HPRT (F:

193 AGGCCAGACTTTGTTGGATTT and R: CAGGACTCCTCGTATTTGCAG); RPL19 (F:  
194 CAATGCCAACTCTCGTCAACAG and R: CATCCAGGTCACCTTCTCGG). GLUT4 was  
195 normalized using three reference genes (PPPIA, HPRT, RPL19) according to geNorm analysis  
196 (Vandesompele et al., 2002).

197 *Western Blotting.* Cytosolic protein extraction was performed from *rectus femoris* muscle in cold lysis  
198 buffer containing 10 mM Tris-HCl, pH 7.4, 0.5 M sucrose, 50 mM NaCl, 5 mM EDTA, 30 mM  
199  $\text{Na}_4\text{P}_2\text{O}_7$ , 1% NP-40, 0.25% sodium deoxycholate, 50 mM NaF, 100  $\mu\text{M}$  sodium orthovanadate and  
200 proteases inhibitors cocktail (Sigma P8340, 5  $\mu\text{l/ml}$ ). The samples were homogenized using a Polytron  
201 homogenizer at 4°C. Each sample was then incubated on ice for 30 min followed by 3 x 10 s of  
202 sonication. The homogenates were then centrifuged at 12,000g for 12 min at 4°C. The protein  
203 concentration of the supernatant was determined by a Lowry assay using bovine serum albumin (BSA)  
204 as standard. Samples were then diluted in SDS-PAGE sample buffer [50 mM Tris-HCl, pH 6.8, 2%  
205 SDS, 10% glycerol, 5%  $\beta$ -mercaptoethanol, and 0.1% bromophenol blue], and heated 5 min at 95°C  
206 until analyses. Fifty micrograms of proteins were resolved on 12.5% SDS-PAGE. The proteins were  
207 transferred at 240 mA for 90 min onto a 0.2- $\mu\text{m}$  nitrocellulose membrane. Membranes were blocked  
208 with 5% BSA or nonfat dry milk in TBST (Tris-buffered saline - 0.05% Tween-20) for 1 h at room  
209 temperature. Membranes were incubated overnight at 4°C with appropriate primary antibodies: AKT  
210 (1:1000, Cell Signaling), p-AKT<sup>Ser473</sup> (1:1000, Cell Signaling), AMPK (1:1000, Cell Signaling), p-  
211 AMPK<sup>Thr172</sup> (1:1000, Cell Signaling), p65 (1:1000, Cell Signaling), p-p65<sup>Ser536</sup> (1:1000, Cell  
212 Signaling), IRS-1 (1:1000, Cell Signaling), pIRS-1<sup>Ser302</sup> (1:1000, Cell Signaling), STAT3 (1:1000, Cell  
213 Signaling), p-STAT3<sup>Ser727</sup>, I $\kappa$ B $\alpha$  (1:1000, Cell Signaling), GLUT4 (1:1000, Abcam), and  $\alpha$ -actin  
214 (1:700, Sigma Aldrich). Thereafter, membranes were washed with TBST and incubated for 1 h at  
215 room temperature with infrared dye-conjugated secondary antibodies (LI-COR, Lincoln, NE, USA).  
216 After washing, blots were captured using the Odyssey Imaging System (LI-COR). All blots were  
217 scanned, densitometric analysis of the bands was conducted using GS-800 Imaging densitometer and  
218 QuantityOne software. Phosphospecific signal was normalized to the total signal to estimate the ratio  
219 of activated markers.

220 *Statistical analysis.* Data are presented as mean  $\pm$  SEM. Normality and equality of variances were  
221 checked using a Kolmogorov-Smirnov and Fischer test, respectively. A one-way analysis of variance  
222 (ANOVA) was performed to compare each parameter between the 3 experimental groups. When  
223 appropriate, the Fisher LSD test was used as a post-hoc analysis. If normality and/or equal variance  
224 tests failed, we checked the significance using one-way ANOVA on ranks (Kruskal-Wallis). When  
225 appropriate, the Dunn's test was used as a post-hoc analysis. For all statistical analyses, the  
226 significance level was set at 0.05. Data were analyzed using the statistical package GraphPad Prism  
227 version 6.02 for Windows (GraphPad Software, La Jolla, California).

228



## 229 RESULTS

230

231 *Physical activity levels, body weight, food intake and visceral fat mass.* During the 10 days of wheel  
232 lock, active mice exhibited a mean daily physical activity levels of  $3.90 \pm 0.78$  km/day. Daily food  
233 intake was lower in both Inactive and Inactive-Myr mice compared to Active mice (-7.9% and -7.6%,  
234  $p=0.007$  and  $0.01$ , respectively, Table 1). After 10 days of wheel lock, body weight significantly  
235 increased only in Active mice. No significant difference of body weight was observed between the 3  
236 experimental groups before and after the 10 days of physical inactivity. Visceral fat mass did not differ  
237 between the 3 experimental groups at the end of the protocol (Table 1).

238 *Muscle triglycerides and ceramides content.* We first observed that muscle triglyceride (TG) content  
239 tend to increase in Inactive mice ( $p=0.09$ , Fig. 1A) whereas it increase in the Inactive-Myr group  
240 ( $p=0.027$ , Fig. 1A). Contrary to our hypothesis, physical inactivity did not modify total, saturated and  
241 unsaturated ceramides content in muscle (Fig. 1B). Individual ceramides species ranging from C16:0  
242 to C24:1 remained also unchanged after 10 days of physical inactivity (Fig. 1C and 1D). Surprisingly,  
243 muscle ceramides content were not affected by 10 days of myriocin treatment (Fig. 1B, 1C and 1D).

244 *Whole-body insulin sensitivity and glucose tolerance.* The effect physical inactivity and myriocin  
245 treatment on whole-body insulin sensitivity was assessed by measuring the circulating level of glucose  
246 and insulin. Fasting glycemia remained unaffected with physical inactivity and myriocin treatment  
247 (Fig. 2A). Serum insulin levels were higher in both Inactive and Inactive-Myr groups compared to  
248 Active group ( $p=0.025$  and  $0.015$ , respectively, Fig. 2B). Such results were associated with a higher  
249 HOMA-IR index in Inactive compared to Active mice ( $p=0.045$ , Fig. 2C), whereas this index did not  
250 differ between Inactive-Myr and Active mice ( $p=0.17$ , Fig. 2C). Thus, myriocin seems to prevent  
251 physical inactivity-induced whole-body insulin resistance. An OGTT was also performed at the end of  
252 the protocol to observe the effects of physical inactivity and myriocin on glucose tolerance. Here, we  
253 did not observe significant difference in glucose concentrations (at all time points) and area under the  
254 curve (AUC) between Active and Inactive mice (Fig. 2D and E). However, we reported that Inactive-  
255 Myr mice exhibited an AUC significantly lower compared to both Active ( $p=0.019$ , Fig. 2D) and  
256 Inactive mice ( $p<0.001$ , Fig. 2D). This effect was due to a lower glucose levels both at the beginning  
257 and the end of OGTT (15 min, 30 min, 90 and 120 min,  $p<0.05$ , Fig. 2E). Taken together, our results  
258 indicate that myriocin improves glucose tolerance.

259 *Proximal insulin signaling and GLUT4 content in skeletal muscle.* We observed a deleterious effect of  
260 physical inactivity on whole-body insulin sensitivity and a beneficial effect of myriocin on glucose  
261 tolerance. To investigate the mechanism regulating such effects, we first evaluated the integrity of  
262 insulin signaling in skeletal muscle by measuring, *ex vivo*, basal and insulin-stimulated Akt activation.  
263 We observed that insulin stimulation increased phospho-Akt levels in Active ( $p=0.019$ ), Inactive

264 ( $p=0.029$ ) and Inactive-Myr ( $p<0.001$ , Fig. 3A). Whereas the magnitude of these responses did not  
265 differ between Active and Inactive mice, Inactive-Myr mice exhibited a higher muscle activation of  
266 Akt in response to insulin when compared to both Active and Inactive mice ( $p=0.046$  and  $p=0.036$ ,  
267 respectively, Fig. 3A). Glucose uptake is recognized to be regulated by insulin signaling and GLUT4  
268 pool in skeletal muscle (Pierre et al., 2016). In the present study, we observed that physical inactivity  
269 reduced GLUT4 protein ( $p=0.043$ , Fig. 3B and 3E), but not GLUT4 mRNA (Fig. 3C). Interestingly,  
270 we observed that myriocin treatment prevent the reduction of muscle GLUT4 protein induced by  
271 physical inactivity ( $p=0.005$ , Fig. 3B). At the mRNA level, GLUT4 was reduced by myriocin in  
272 Inactive-Myr compared to Inactive mice ( $p=0.031$ , Fig. 3B). As AMP-activated protein kinase  
273 (AMPK) is recognized to regulate GLUT4 expression and it translocation to the membrane (McGee et  
274 al., 2008), we decided to measure the levels of AMPK activation in skeletal muscle. We reported that  
275 AMPK activation remained unchanged in Inactive compared to Active mice (Fig. 3D and E).  
276 Interestingly, we showed that AMPK activation was higher in myriocin-treated mice compared to both  
277 Active and Inactive mice ( $p=0.031$  and  $p=0.003$ , respectively, Fig. 3D and 3E). In insulin-resistant  
278 rodent models, chronic hyperphosphorylation of IRS1 on Ser<sup>302</sup> has been identified as playing a key  
279 role in muscle insulin resistance (Morino et al., 2008). In our experiments, no significant change was  
280 observed in the phosphorylation state of IRS1 on Ser<sup>302</sup> between the 3 experimental groups (Fig. 4A  
281 and 4E). Muscle insulin resistance is also related to activation of NF- $\kappa$ B and IL6/STAT3  
282 inflammatory signaling pathways (Gratas-Delamarche et al., 2014). Here, we reported that physical  
283 inactivity combined or not with myriocin treatment did not modulate phospho-p65 and I $\kappa$ B $\alpha$  (Fig. 4C  
284 and 4E), two well-recognized markers of NF- $\kappa$ B activation (Christian et al., 2016). Similarly,  
285 phosphorylation of STAT3 on Ser<sup>727</sup> remained unchanged in the three experimental groups (Fig. 4B  
286 and 4E).

## 287 **DISCUSSION**

288 Muscle ceramides are known to play a key role in the development of insulin resistance during high  
289 fat nutritional intake, but their role in physical inactivity-induced insulin resistance are poorly  
290 understood. Our data support that early insulin resistance observed with physical inactivity is not due  
291 to ceramide accumulation but could be caused by a reduction in muscle GLUT4 content. We also  
292 observed that 10 days of myriocin treatment in inactive mice improve glucose tolerance, but  
293 surprisingly through a mechanism that appears independent of changes in muscle ceramide content.

294 Immobilization rapidly causes both in humans and rodents a reduction in fatty acid (FA) transport to  
295 mitochondria and in mitochondrial FA  $\beta$ -oxidation, resulting in an accumulation of intramuscular  
296 lipids (Bergouignan et al., 2006; Kwon et al., 2016; Laye et al., 2009; Momken et al., 2011; Salaun et  
297 al., 2016). Saturated FA oxidation, including palmitate, are particularly reduced in skeletal muscle  
298 during immobilization (Bergouignan et al., 2011). Interestingly, palmitate is well identified to increase

299 the expression of serine palmitoyltransferase 2 (SPT2), a key enzyme in ceramide biosynthesis  
300 (Erickson et al., 2012). Ceramides have been identified as key bioactive sphingolipids in the  
301 development of muscle insulin resistance, especially the C:16 and C:18 moieties, which are the most  
302 abundant in skeletal muscle (Chung et al., 2017; Perreault et al., 2018). Based on previous data from  
303 our laboratory and others showing in rodents that C:16 and C:18 ceramides increase in skeletal muscle  
304 after 1 or 2 weeks of immobilization (Kwon et al., 2016; Salaun et al., 2016), we hypothesized that 10  
305 days of physical inactivity induced by wheel lock will also cause muscle ceramide accumulation.  
306 Herein, we show that muscle ceramides are not responsible of insulin resistance induced by physical  
307 inactivity. Contrary to immobilization, we observed that total and saturated ceramide levels in muscle  
308 remained unchanged after 10 days of physical inactivity. This was also the case for muscle TG which  
309 are increase after immobilization (3, 50), while we reported only a trend with physical inactivity. All  
310 together, these results support that immobilization and physical inactivity are not equivalent models to  
311 study the effect of a reduction of energy expenditure.

312 In rodents, the wheel lock model is currently the closest model to mimic human physical inactivity  
313 (Roberts et al., 2012). Using this model in mice, we observed that 10 days of physical inactivity are  
314 sufficient to induce hyperinsulinemia and to increase the HOMA-IR, both considered as hallmarks of  
315 insulin resistance (Singh and Saxena, 2010). These results are in accordance with previous studies  
316 conducted in Sprague-Dawley or OLETF rats after 7 days of wheel lock (Rector et al., 2010, 2008;  
317 Teich et al., 2017). Few data are available about the effects of the wheel lock model on glucose  
318 tolerance. Teich and colleagues recently observed that 7 days of wheel lock were sufficient to affect  
319 glucose tolerance in young Sprague-Dawley male rats (Teich et al., 2017). In the present study, we did  
320 not report an effect on glucose tolerance after 10 days of wheel lock. Our results are in accordance  
321 with data obtained in humans exposed to a reduction in daily number of steps during 5 or 14 days,  
322 where no change in glucose tolerance was reported (Knudsen et al., 2012; Reynolds et al., 2015). All  
323 together, these results sustain that the wheel lock model is a realistic experimental set-up to study, in  
324 mice, human physical inactivity and its role in chronic diseases development.

325 Skeletal muscle being responsible of 80% of whole-body glucose uptake under insulin stimulation  
326 (DeFronzo et al., 1985), early insulin resistance occurring with physical inactivity is mainly attributed  
327 to alterations in skeletal muscle glucose uptake (Knudsen et al., 2012; Krogh-Madsen et al., 2010).  
328 Interestingly, using the wheel lock model during only 2 days, Kump and Booth observed a reduction  
329 of insulin-stimulated 2-deoxyglucose uptake in skeletal muscle (Kump and Booth, 2005). Similar  
330 results were also reported in rats submitted to muscle unloading after 24h (Kawamoto et al., 2016;  
331 O'keefe et al., 2004). However, the mechanisms by which physical inactivity and muscle unloading  
332 rapidly induce muscle insulin resistance remain unclear. Krogh-Madsen and colleagues (2010) have  
333 reported that a reduction of muscle Akt phosphorylation during hyperinsulinemic euglycemic clamp  
334 occurred after 2 weeks of reduction of ambulatory activity, thus supporting the idea that insulin  
335 signaling was early affected by physical inactivity. However, if the clamp is the gold standard to

336 assess peripheral insulin sensitivity, it appears less appropriate to assess insulin signaling. Indeed,  
337 presence of circulating hormones or cytokines (e.g. leptin, adiponectin, IL-6) and muscle contractility  
338 are all factors affecting muscle insulin signaling during clamp, independently of direct action of  
339 insulin. For these reasons, we decided to explore insulin-stimulated muscle Akt phosphorylation in *ex-*  
340 *vivo* conditions to determine whether insulin signaling was affected with a short period of physical  
341 inactivity. In this condition, we observed that Akt phosphorylation in inactive mice did not differ from  
342 active animals, suggesting that insulin signaling until Akt remains unaffected after 10 days of physical  
343 inactivity. To support such results, we explored the effects of physical inactivity on inflammatory  
344 pathways recognized to affect insulin signaling. Here, neither NF- $\kappa$ B nor IL-6/STAT3 signaling  
345 pathways were affected in skeletal muscle of inactive mice. Further, in response to pro-inflammatory  
346 state IRS1 is inhibited by a phosphorylation on its Ser<sup>302</sup> (Gratas-Delamarche et al., 2014; Hage  
347 Hassan et al., 2016; Morino et al., 2008). In the present study, we found that physical inactivity did not  
348 modify the phosphorylation state IRS1<sup>Ser302</sup>. Taken together, these results indicate that, in the context  
349 of physical inactivity, the onset of insulin resistance is not due an inflammatory process affecting the  
350 skeletal muscle.

351 Our data support that muscle insulin signaling does not appear affected by a short period of physical  
352 inactivity. In accordance with Kump and Booth (2005), we reported that 10 days of wheel lock caused  
353 a significant reduction of GLUT4 pool in skeletal muscle. These results support the idea that  
354 inactivity-induced muscle insulin resistance would be rather related to a decrease of muscle GLUT4  
355 pool than a defect in insulin signaling. Interestingly, we observed that mRNA coding for GLUT4 was  
356 not affected suggesting that the decrease of GLUT4 pool would be due to an increase of its  
357 degradation. It is well established that chronic insulin stimulation causes a decrease of GLUT4 content  
358 in adipocytes, mainly due to an accelerated GLUT4 degradation in the lysosomes (Liu et al., 2007; Ma  
359 et al., 2014, p. 4; Sargeant and Pâquet, 1993). Similar cellular events could occur in skeletal muscle of  
360 inactive. Such mechanisms need to be explored in further experiments.

361 To explore the role of ceramides in physical inactivity-induced insulin resistance, we treated inactive  
362 mice with myriocin, an inhibitor of *de novo* synthesis of ceramides. As previously reported in others  
363 experimental models including Zucker diabetic rats or high fat diet-fed mice (Holland et al., 2007;  
364 Ussher et al., 2010), we observed that myriocin treatment improved glucose tolerance in inactive mice.  
365 Interestingly, we also reported that myriocin treatment caused a significant increase of AMPK  
366 phosphorylation. This result is in accordance with the data of Liu and colleagues (2013) demonstrating  
367 that myriocin prolonged yeast lifespan by activating key signaling pathways controlling stress  
368 resistance and energy metabolic homeostasis including AMPK signaling pathway. Thus, the beneficial  
369 effect of myriocin on glucose tolerance could be mediated by AMPK (Jensen et al., 2014).  
370 Interestingly, we also observed higher insulin-stimulated Akt phosphorylation in myriocin-treated  
371 compared to non-treated inactive mice. Such improvement of muscle insulin signaling could be linked  
372 to AMPK activation since this kinase is recognized to enhance the response of Akt phosphorylation on

373 serine 473 residue through the modulation of MTORC2 complex activity (Kleinert et al., 2016;  
374 Sarbassov et al., 2005). We also observed that myriocin prevents the decrease of GLUT4 induced by  
375 physical inactivity. Although AMPK has been proposed to stimulate GLUT4 transcription (Gong et  
376 al., 2011; McGee et al., 2008), we observed a decrease of GLUT4 mRNA associated with AMPK  
377 activation in Inactive-My compared to Inactive mice. Consequently, an AMPK-independent  
378 mechanism could be responsible of the effect of myriocin on muscle GLUT4 protein. To sum up, the  
379 effect of myriocin on glucose tolerance seems implicated a coordination of AMPK, Akt and GLUT4 in  
380 a manner that needs to be elucidated. Contrary to our hypothesis, the benefits of myriocin treatment on  
381 glucose tolerance are not associated to modulation in muscle ceramide concentrations. The previous  
382 studies reporting in mice a beneficial effect of myriocin on glucose tolerance and insulin sensitivity  
383 were associated to a prevention of muscle ceramide accumulation induced by high fat diet or  
384 pathological genetic background (Holland et al., 2007; Ussher et al., 2010; Yang et al., 2009). Herein,  
385 we found that myriocin and physical inactivity act on insulin sensitivity independently from  
386 ceramides, thus highlighting the need to explore other hypothesis.  
387 In summary, our results support that muscle ceramide accumulation and inflammatory pathways do  
388 not play a role in physical inactivity-induced insulin resistance. The insulin resistance observed after a  
389 short period of physical inactivity seems related to a reduction in muscle GLUT4 content rather than to  
390 defects of muscle insulin signaling. Our findings also support that immobilization is not what inactive  
391 people experience, and that biological effects obtained with this kind of models should not associated  
392 with physical inactivity. Finally, our data highlight that myriocin could be a promising molecule to  
393 improve glucose tolerance and muscle insulin sensitivity.

394

#### 395 **ACKNOWLEDGMENTS**

396 The authors thank Véronique Ferchaud-Roucher and Mickael Croyal (Corsaire platform, CRNH,  
397 UMR1280, Nantes) for technical help in sphingolipid analyses.

#### 398 **GRANTS**

399 This study was supported by grants from the Brittany Research Council (SAD program – MusFer  
400 n°8802) and ID2Santé-Bretagne (PICAM project).

401

#### 402 **DISCLOSURES**

403 No conflict of interest, financial or otherwise, are declared by the author(s).

404

#### 405 **REFERENCES**

- 406 Bergouignan, A., Rudwill, F., Simon, C., Blanc, S., 2011. Physical inactivity as the culprit of  
407 metabolic inflexibility: evidence from bed-rest studies. *J. Appl. Physiol.* Bethesda Md 1985  
408 111, 1201–1210. <https://doi.org/10.1152/jappphysiol.00698.2011>
- 409 Bergouignan, A., Schoeller, D.A., Normand, S., Gauquelin-Koch, G., Laville, M., Shriver, T., Desage,  
410 M., Le Maho, Y., Ohshima, H., Gharib, C., Blanc, S., 2006. Effect of physical inactivity on  
411 the oxidation of saturated and monounsaturated dietary Fatty acids: results of a randomized  
412 trial. *PLoS Clin. Trials* 1, e27. <https://doi.org/10.1371/journal.pctr.0010027>
- 413 Bergouignan, A., Trudel, G., Simon, C., Chopard, A., Schoeller, D.A., Momken, I., Votruba, S.B.,  
414 Desage, M., Burdge, G.C., Gauquelin-Koch, G., Normand, S., Blanc, S., 2009. Physical  
415 inactivity differentially alters dietary oleate and palmitate trafficking. *Diabetes* 58, 367–376.  
416 <https://doi.org/10.2337/db08-0263>
- 417 Bligh, E.G., Dyer, W.J., 1959. A rapid method of total lipid extraction and purification. *Can. J.*  
418 *Biochem. Physiol.* 37, 911–917. <https://doi.org/10.1139/o59-099>
- 419 Bodennec, J., Koul, O., Aguado, I., Brichon, G., Zwingelstein, G., Portoukalian, J., 2000. A procedure  
420 for fractionation of sphingolipid classes by solid-phase extraction on aminopropyl cartridges.  
421 *J. Lipid Res.* 41, 1524–1531.
- 422 Booth, F.W., Roberts, C.K., Thyfault, J.P., Ruegsegger, G.N., Toedebusch, R.G., 2017. Role of  
423 Inactivity in Chronic Diseases: Evolutionary Insight and Pathophysiological Mechanisms.  
424 *Physiol. Rev.* 97, 1351–1402. <https://doi.org/10.1152/physrev.00019.2016>
- 425 Chavez, J.A., Summers, S.A., 2003. Characterizing the effects of saturated fatty acids on insulin  
426 signaling and ceramide and diacylglycerol accumulation in 3T3-L1 adipocytes and C2C12  
427 myotubes. *Arch. Biochem. Biophys.* 419, 101–109.
- 428 Christian, F., Smith, E.L., Carmody, R.J., 2016. The Regulation of NF- $\kappa$ B Subunits by  
429 Phosphorylation. *Cells* 5. <https://doi.org/10.3390/cells5010012>
- 430 Chung, J.O., Koutsari, C., Blachnio-Zabielska, A.U., Hames, K.C., Jensen, M.D., 2017.  
431 Intramyocellular Ceramides: Subcellular Concentrations and Fractional De Novo Synthesis in  
432 Postabsorptive Humans. *Diabetes* 66, 2082–2091. <https://doi.org/10.2337/db17-0082>
- 433 DeFronzo, R.A., Gunnarsson, R., Björkman, O., Olsson, M., Wahren, J., 1985. Effects of insulin on  
434 peripheral and splanchnic glucose metabolism in noninsulin-dependent (type II) diabetes  
435 mellitus. *J. Clin. Invest.* 76, 149–155. <https://doi.org/10.1172/JCI111938>
- 436 Ding, D., Lawson, K.D., Kolbe-Alexander, T.L., Finkelstein, E.A., Katzmarzyk, P.T., van Mechelen,  
437 W., Pratt, M., Lancet Physical Activity Series 2 Executive Committee, 2016. The economic  
438 burden of physical inactivity: a global analysis of major non-communicable diseases. *Lancet*  
439 *Lond. Engl.* 388, 1311–1324. [https://doi.org/10.1016/S0140-6736\(16\)30383-X](https://doi.org/10.1016/S0140-6736(16)30383-X)
- 440 Erickson, K.A., Smith, M.E., Anthonymuthu, T.S., Evanson, M.J., Brassfield, E.S., Hodson, A.E.,  
441 Bressler, M.A., Tucker, B.J., Thatcher, M.O., Prince, J.T., Hancock, C.R., Bikman, B.T.,  
442 2012. AICAR inhibits ceramide biosynthesis in skeletal muscle. *Diabetol. Metab. Syndr.* 4,  
443 45. <https://doi.org/10.1186/1758-5996-4-45>
- 444 Gong, H., Xie, J., Zhang, N., Yao, L., Zhang, Y., 2011. MEF2A binding to the Glut4 promoter occurs  
445 via an AMPK $\alpha$ 2-dependent mechanism. *Med. Sci. Sports Exerc.* 43, 1441–1450.  
446 <https://doi.org/10.1249/MSS.0b013e31820f6093>
- 447 Gratas-Delamarche, A., Derbré, F., Vincent, S., Cillard, J., 2014. Physical inactivity, insulin  
448 resistance, and the oxidative-inflammatory loop. *Free Radic. Res.* 48, 93–108.  
449 <https://doi.org/10.3109/10715762.2013.847528>
- 450 Hage Hassan, R., Pacheco de Sousa, A.C., Mahfouz, R., Hainault, I., Blachnio-Zabielska, A., Bourron,  
451 O., Koskas, F., Górski, J., Ferré, P., Foufelle, F., Hajdouch, E., 2016. Sustained Action of  
452 Ceramide on the Insulin Signaling Pathway in Muscle Cells: IMPLICATION OF THE  
453 DOUBLE-STRANDED RNA-ACTIVATED PROTEIN KINASE. *J. Biol. Chem.* 291, 3019–  
454 3029. <https://doi.org/10.1074/jbc.M115.686949>
- 455 Hallal, P.C., Andersen, L.B., Bull, F.C., Guthold, R., Haskell, W., Ekelund, U., Lancet Physical  
456 Activity Series Working Group, 2012. Global physical activity levels: surveillance progress,  
457 pitfalls, and prospects. *Lancet Lond. Engl.* 380, 247–257. [https://doi.org/10.1016/S0140-6736\(12\)60646-1](https://doi.org/10.1016/S0140-6736(12)60646-1)
- 459 Hamburg, N.M., McMackin, C.J., Huang, A.L., Shenouda, S.M., Widlansky, M.E., Schulz, E., Gokce,  
460 N., Ruderman, N.B., Keaney, J.F., Vita, J.A., 2007. Physical inactivity rapidly induces insulin



- 461 resistance and microvascular dysfunction in healthy volunteers. *Arterioscler. Thromb. Vasc.*  
462 *Biol.* 27, 2650–2656. <https://doi.org/10.1161/ATVBAHA.107.153288>
- 463 Hannun, Y.A., Luberto, C., 2000. Ceramide in the eukaryotic stress response. *Trends Cell Biol.* 10,  
464 73–80.
- 465 Hojjati, M.R., Li, Z., Zhou, H., Tang, S., Huan, C., Ooi, E., Lu, S., Jiang, X.-C., 2005. Effect of  
466 myriocin on plasma sphingolipid metabolism and atherosclerosis in apoE-deficient mice. *J.*  
467 *Biol. Chem.* 280, 10284–10289. <https://doi.org/10.1074/jbc.M412348200>
- 468 Holland, W.L., Brozinick, J.T., Wang, L.-P., Hawkins, E.D., Sargent, K.M., Liu, Y., Narra, K., Hoehn,  
469 K.L., Knotts, T.A., Siesky, A., Nelson, D.H., Karathanasis, S.K., Fontenot, G.K., Birnbaum,  
470 M.J., Summers, S.A., 2007. Inhibition of Ceramide Synthesis Ameliorates Glucocorticoid-,  
471 Saturated-Fat-, and Obesity-Induced Insulin Resistance. *Cell Metab.* 5, 167–179.  
472 <https://doi.org/10.1016/j.cmet.2007.01.002>
- 473 Jensen, T.E., Sylow, L., Rose, A.J., Madsen, A.B., Angin, Y., Maarbjerg, S.J., Richter, E.A., 2014.  
474 Contraction-stimulated glucose transport in muscle is controlled by AMPK and mechanical  
475 stress but not sarcoplasmic reticulum Ca<sup>2+</sup> release. *Mol. Metab.* 3, 742–753.  
476 <https://doi.org/10.1016/j.molmet.2014.07.005>
- 477 Kawamoto, E., Koshinaka, K., Yoshimura, T., Masuda, H., Kawanaka, K., 2016. Immobilization  
478 rapidly induces muscle insulin resistance together with the activation of MAPKs (JNK and  
479 p38) and impairment of AS160 phosphorylation. *Physiol. Rep.* 4,  
480 <https://doi.org/10.14814/phy2.12876>
- 481 Kleinert, M., Parker, B.L., Chaudhuri, R., Fazakerley, D.J., Serup, A., Thomas, K.C., Krycer, J.R.,  
482 Sylow, L., Fritzen, A.M., Hoffman, N.J., Jeppesen, J., Schjerling, P., Ruegg, M.A., Kiens, B.,  
483 James, D.E., Richter, E.A., 2016. mTORC2 and AMPK differentially regulate muscle  
484 triglyceride content via Perilipin 3. *Mol. Metab.* 5, 646–655.  
485 <https://doi.org/10.1016/j.molmet.2016.06.007>
- 486 Knudsen, S.H., Hansen, L.S., Pedersen, M., Dejgaard, T., Hansen, J., Hall, G.V., Thomsen, C.,  
487 Solomon, T.P.J., Pedersen, B.K., Krogh-Madsen, R., 2012. Changes in insulin sensitivity  
488 precede changes in body composition during 14 days of step reduction combined with  
489 overfeeding in healthy young men. *J. Appl. Physiol. Bethesda Md* 1985 113, 7–15.  
490 <https://doi.org/10.1152/japplphysiol.00189.2011>
- 491 Krogh-Madsen, R., Thyfault, J.P., Broholm, C., Mortensen, O.H., Olsen, R.H., Mounier, R.,  
492 Plomgaard, P., van Hall, G., Booth, F.W., Pedersen, B.K., 2010. A 2-wk reduction of  
493 ambulatory activity attenuates peripheral insulin sensitivity. *J. Appl. Physiol. Bethesda Md*  
494 1985 108, 1034–1040. <https://doi.org/10.1152/japplphysiol.00977.2009>
- 495 Kump, D.S., Booth, F.W., 2005. Alterations in insulin receptor signalling in the rat epitrochlearis  
496 muscle upon cessation of voluntary exercise. *J. Physiol.* 562, 829–838.  
497 <https://doi.org/10.1113/jphysiol.2004.073593>
- 498 Kwon, O.S., Nelson, D.S., Barrows, K.M., O’Connell, R.M., Drummond, M.J., 2016. Intramyocellular  
499 ceramides and skeletal muscle mitochondrial respiration are partially regulated by Toll-like  
500 receptor 4 during hindlimb unloading. *Am. J. Physiol. Regul. Integr. Comp. Physiol.* 311,  
501 R879–R887. <https://doi.org/10.1152/ajpregu.00253.2016>
- 502 Laye, M.J., Rector, R.S., Borengasser, S.J., Naples, S.P., Uptergrove, G.M., Ibdah, J.A., Booth, F.W.,  
503 Thyfault, J.P., 2009. Cessation of daily wheel running differentially alters fat oxidation  
504 capacity in liver, muscle, and adipose tissue. *J. Appl. Physiol. Bethesda Md* 1985 106, 161–  
505 168. <https://doi.org/10.1152/japplphysiol.91186.2008>
- 506 Lee, B.J., Kim, Jae Seon, Kim, B.K., Jung, S.J., Joo, M.K., Hong, S.G., Kim, Jang Soo, Kim, J.H.,  
507 Yeon, J.E., Park, J.-J., Byun, K.S., Bak, Y.-T., Yoo, H.-S., Oh, S., 2010. Effects of  
508 sphingolipid synthesis inhibition on cholesterol gallstone formation in C57BL/6J mice. *J.*  
509 *Gastroenterol. Hepatol.* 25, 1105–1110. <https://doi.org/10.1111/j.1440-1746.2010.06246.x>
- 510 Lee, I.-M., Shiroma, E.J., Lobelo, F., Puska, P., Blair, S.N., Katzmarzyk, P.T., Lancet Physical  
511 Activity Series Working Group, 2012. Effect of physical inactivity on major non-  
512 communicable diseases worldwide: an analysis of burden of disease and life expectancy.  
513 *Lancet Lond. Engl.* 380, 219–229. [https://doi.org/10.1016/S0140-6736\(12\)61031-9](https://doi.org/10.1016/S0140-6736(12)61031-9)

- 514 Liu, J., Huang, X., Withers, B.R., Blalock, E., Liu, K., Dickson, R.C., 2013. Reducing Sphingolipid  
515 Synthesis Orchestrates Global Changes to Extend Yeast Lifespan. *Aging Cell* 12, 833–841.  
516 <https://doi.org/10.1111/accel.12107>
- 517 Liu, L.-B., Omata, W., Kojima, I., Shibata, H., 2007. The SUMO conjugating enzyme Ubc9 is a  
518 regulator of GLUT4 turnover and targeting to the insulin-responsive storage compartment in  
519 3T3-L1 adipocytes. *Diabetes* 56, 1977–1985. <https://doi.org/10.2337/db06-1100>
- 520 Ma, J., Nakagawa, Y., Kojima, I., Shibata, H., 2014. Prolonged insulin stimulation down-regulates  
521 GLUT4 through oxidative stress-mediated retromer inhibition by a protein kinase CK2-  
522 dependent mechanism in 3T3-L1 adipocytes. *J. Biol. Chem.* 289, 133–142.  
523 <https://doi.org/10.1074/jbc.M113.533240>
- 524 Matthews, D.R., Hosker, J.P., Rudenski, A.S., Naylor, B.A., Treacher, D.F., Turner, R.C., 1985.  
525 Homeostasis model assessment: insulin resistance and beta-cell function from fasting plasma  
526 glucose and insulin concentrations in man. *Diabetologia* 28, 412–419.
- 527 McGee, S.L., van Denderen, B.J.W., Howlett, K.F., Mollica, J., Schertzer, J.D., Kemp, B.E.,  
528 Hargreaves, M., 2008. AMP-activated protein kinase regulates GLUT4 transcription by  
529 phosphorylating histone deacetylase 5. *Diabetes* 57, 860–867. <https://doi.org/10.2337/db07-0843>
- 530
- 531 Momken, I., Stevens, L., Bergouignan, A., Desplanches, D., Rudwill, F., Chery, I., Zahariev, A., Zahn,  
532 S., Stein, T.P., Sebedio, J.L., Pujos-Guillot, E., Falempin, M., Simon, C., Coxam, V.,  
533 Andrianjafinony, T., Gauquelin-Koch, G., Picquet, F., Blanc, S., 2011. Resveratrol prevents  
534 the wasting disorders of mechanical unloading by acting as a physical exercise mimetic in the  
535 rat. *FASEB J. Off. Publ. Fed. Am. Soc. Exp. Biol.* 25, 3646–3660.  
536 <https://doi.org/10.1096/fj.10-177295>
- 537 Morino, K., Neschen, S., Bilz, S., Sono, S., Tsigiriotis, D., Reznick, R.M., Moore, I., Nagai, Y.,  
538 Samuel, V., Sebastian, D., White, M., Philbrick, W., Shulman, G.I., 2008. Muscle-Specific  
539 IRS-1 Ser→Ala Transgenic Mice Are Protected From Fat-Induced Insulin Resistance in  
540 Skeletal Muscle. *Diabetes* 57, 2644–2651. <https://doi.org/10.2337/db06-0454>
- 541 O'keefe, M.P., Perez, F.R., Kinnick, T.R., Tischler, M.E., Henriksen, E.J., 2004. Development of  
542 whole-body and skeletal muscle insulin resistance after one day of hindlimb suspension.  
543 *Metabolism*. 53, 1215–1222.
- 544 Olsen, R.H., Krogh-Madsen, R., Thomsen, C., Booth, F.W., Pedersen, B.K., 2008. Metabolic  
545 responses to reduced daily steps in healthy nonexercising men. *JAMA* 299, 1261–1263.  
546 <https://doi.org/10.1001/jama.299.11.1259>
- 547 Pedersen, B.K., 2009. The disease of physical inactivity--and the role of myokines in muscle--fat  
548 cross talk. *J. Physiol.* 587, 5559–5568. <https://doi.org/10.1113/jphysiol.2009.179515>
- 549 Perreault, L., Newsom, S.A., Strauss, A., Kerege, A., Kahn, D.E., Harrison, K.A., Snell-Bergeon, J.K.,  
550 Nemkov, T., D'Alessandro, A., Jackman, M.R., MacLean, P.S., Bergman, B.C., 2018.  
551 Intracellular localization of diacylglycerols and sphingolipids influences insulin sensitivity and  
552 mitochondrial function in human skeletal muscle. *JCI Insight* 3.  
553 <https://doi.org/10.1172/jci.insight.96805>
- 554 Pierre, N., Appriou, Z., Gratas-Delamarche, A., Derbré, F., 2016. From physical inactivity to  
555 immobilization: Dissecting the role of oxidative stress in skeletal muscle insulin resistance and  
556 atrophy. *Free Radic. Biol. Med.* 98, 197–207.  
557 <https://doi.org/10.1016/j.freeradbiomed.2015.12.028>
- 558 Rector, R.S., Thyfault, J.P., Laye, M.J., Morris, R.T., Borengasser, S.J., Uptergrove, G.M.,  
559 Chakravarthy, M.V., Booth, F.W., Ibdah, J.A., 2008. Cessation of daily exercise dramatically  
560 alters precursors of hepatic steatosis in Otsuka Long-Evans Tokushima Fatty (OLETF) rats. *J.*  
561 *Physiol.* 586, 4241–4249. <https://doi.org/10.1113/jphysiol.2008.156745>
- 562 Rector, R.S., Uptergrove, G.M., Borengasser, S.J., Mikus, C.R., Morris, E.M., Naples, S.P., Laye,  
563 M.J., Laughlin, M.H., Booth, F.W., Ibdah, J.A., Thyfault, J.P., 2010. Changes in skeletal  
564 muscle mitochondria in response to the development of type 2 diabetes or prevention by daily  
565 wheel running in hyperphagic OLETF rats. *Am. J. Physiol. Endocrinol. Metab.* 298, E1179-  
566 1187. <https://doi.org/10.1152/ajpendo.00703.2009>



- 567 Reynolds, L.J., Credeur, D.P., Holwerda, S.W., Leidy, H.J., Fadel, P.J., Thyfault, J.P., 2015. Acute  
568 inactivity impairs glycemic control but not blood flow to glucose ingestion. *Med. Sci. Sports*  
569 *Exerc.* 47, 1087–1094. <https://doi.org/10.1249/MSS.0000000000000508>
- 570 Roberts, M.D., Company, J.M., Brown, J.D., Toedebusch, R.G., Padilla, J., Jenkins, N.T., Laughlin,  
571 M.H., Booth, F.W., 2012. Potential clinical translation of juvenile rodent inactivity models to  
572 study the onset of childhood obesity. *Am. J. Physiol. Regul. Integr. Comp. Physiol.* 303,  
573 R247-258. <https://doi.org/10.1152/ajpregu.00167.2012>
- 574 Salaun, E., Lefevre-Orfila, L., Cavey, T., Martin, B., Turlin, B., Ropert, M., Loreal, O., Derbré, F.,  
575 2016. Myriocin prevents muscle ceramide accumulation but not muscle fiber atrophy during  
576 short-term mechanical unloading. *J. Appl. Physiol. Bethesda Md* 120, 178–187.  
577 <https://doi.org/10.1152/jappphysiol.00720.2015>
- 578 Samuel, V.T., Shulman, G.I., 2012. Mechanisms for insulin resistance: common threads and missing  
579 links. *Cell* 148, 852–871. <https://doi.org/10.1016/j.cell.2012.02.017>
- 580 Sarbassov, D.D., Guertin, D.A., Ali, S.M., Sabatini, D.M., 2005. Phosphorylation and regulation of  
581 Akt/PKB by the rictor-mTOR complex. *Science* 307, 1098–1101.  
582 <https://doi.org/10.1126/science.1106148>
- 583 Sargeant, R.J., Pâquet, M.R., 1993. Effect of insulin on the rates of synthesis and degradation of  
584 GLUT1 and GLUT4 glucose transporters in 3T3-L1 adipocytes. *Biochem. J.* 290 ( Pt 3), 913–  
585 919.
- 586 Schmitz-Peiffer, C., 2010. Targeting Ceramide Synthesis to Reverse Insulin Resistance. *Diabetes* 59,  
587 2351–2353. <https://doi.org/10.2337/db10-0912>
- 588 Singh, B., Saxena, A., 2010. Surrogate markers of insulin resistance: A review. *World J. Diabetes* 1,  
589 36–47. <https://doi.org/10.4239/wjd.v1.i2.36>
- 590 Softic, S., Kirby, M., Berger, N.G., Shroyer, N.F., Woods, S.C., Kohli, R., 2012. Insulin concentration  
591 modulates hepatic lipid accumulation in mice in part via transcriptional regulation of fatty acid  
592 transport proteins. *PLoS One* 7, e38952. <https://doi.org/10.1371/journal.pone.0038952>
- 593 Stumvoll, M., Jacob, S., Wahl, H.G., Hauer, B., Löblein, K., Grauer, P., Becker, R., Nielsen, M.,  
594 Renn, W., Häring, H., 2000. Suppression of systemic, intramuscular, and subcutaneous  
595 adipose tissue lipolysis by insulin in humans. *J. Clin. Endocrinol. Metab.* 85, 3740–3745.  
596 <https://doi.org/10.1210/jcem.85.10.6898>
- 597 Tardif, N., Salles, J., Landrier, J.-F., Mothe-Satney, I., Guillet, C., Boue-Vaysse, C., Combaret, L.,  
598 Giraudet, C., Patrac, V., Bertrand-Michel, J., Migné, C., Chardigny, J.-M., Boirie, Y.,  
599 Walrand, S., 2011. Oleate-enriched diet improves insulin sensitivity and restores muscle  
600 protein synthesis in old rats. *Clin. Nutr. Edinb. Scotl.* 30, 799–806.  
601 <https://doi.org/10.1016/j.clnu.2011.05.009>
- 602 Teich, T., Pivovarov, J.A., Porras, D.P., Dunford, E.C., Riddell, M.C., 2017. Curcumin limits weight  
603 gain, adipose tissue growth, and glucose intolerance following the cessation of exercise and  
604 caloric restriction in rats. *J. Appl. Physiol. Bethesda Md* 123, 1625–1634.  
605 <https://doi.org/10.1152/jappphysiol.01115.2016>
- 606 Tsujimoto, T., Kajio, H., Sugiyama, T., 2017. Association between hyperinsulinemia and increased  
607 risk of cancer death in nonobese and obese people: A population-based observational study.  
608 *Int. J. Cancer* 141, 102–111. <https://doi.org/10.1002/ijc.30729>
- 609 Ussher, J.R., Koves, T.R., Cadete, V.J.J., Zhang, L., Jaswal, J.S., Swyrd, S.J., Lopaschuk, D.G.,  
610 Proctor, S.D., Keung, W., Muoio, D.M., Lopaschuk, G.D., 2010. Inhibition of De Novo  
611 Ceramide Synthesis Reverses Diet-Induced Insulin Resistance and Enhances Whole-Body  
612 Oxygen Consumption. *Diabetes* 59, 2453–2464. <https://doi.org/10.2337/db09-1293>
- 613 Vandesompele, J., De Preter, K., Pattyn, F., Poppe, B., Van Roy, N., De Paepe, A., Speleman, F.,  
614 2002. Accurate normalization of real-time quantitative RT-PCR data by geometric averaging  
615 of multiple internal control genes. *Genome Biol.* 3, RESEARCH0034.
- 616 Yang, G., Badeanlou, L., Bielawski, J., Roberts, A.J., Hannun, Y.A., Samad, F., 2009. Central role of  
617 ceramide biosynthesis in body weight regulation, energy metabolism, and the metabolic  
618 syndrome. *Am. J. Physiol. Endocrinol. Metab.* 297, E211-224.  
619 <https://doi.org/10.1152/ajpendo.91014.2008>
- 620  
621

|                                       | <b>Active</b>            | <b>Inactive</b>          | <b>Inactive-Myr</b>      |
|---------------------------------------|--------------------------|--------------------------|--------------------------|
| <b>Body weight (g)</b>                |                          |                          |                          |
| <b>Before locking</b>                 | 25.2 ± 0.5               | 25.8 ± 0.2               | 24.8 ± 0.2               |
| <b>10 days post-locking</b>           | 25.8 ± 0.6 <sup>\$</sup> | 25.9 ± 0.2               | 24.5 ± 0.3               |
| <b>Food intake (g/day)</b>            | 4.16 ± 0.05              | 3.83 ± 0.09 <sup>*</sup> | 3.84 ± 0.08 <sup>*</sup> |
| <b>Physical activity (km/day)</b>     | 3.90 ± 0.78              | -----                    | -----                    |
| <b>Visceral fat mass (g/100 g BW)</b> | 2.12 ± 0.19              | 2.30 ± 0.25              | 2.08 ± 0.15              |

622

623 **Table 1. Effects of physical inactivity and myriocin treatment on body weight, food intake and**  
624 **visceral fat mass.** Data are presented as mean ± SEM. Significant differences (p< 0.05) are indicated  
625 as follows: comparison vs. values before wheel locking (\$), comparison vs. Active group (\*)

626 **Figure 1. Effects of physical inactivity and myriocin treatment on lipids profile.** Data are  
627 presented as mean  $\pm$  SEM (n=7-8/group). *A*: triglycerides content. *B*: total, saturated, and unsaturated  
628 ceramide content. *C*: unsaturated species profile. *D*: saturated species profile. Significant differences  
629 are indicated as follows: comparison vs. Active group (\*: p<0.05)

630

631 **Figure 2. Effects of physical inactivity and myriocin treatment on whole-body insulin sensitivity**  
632 **and glucose tolerance.** Data are presented as mean  $\pm$  SEM (n=7-8/group). *A*: serum glucose  
633 concentrations. *B*: serum insulin concentrations. *C*: HOMA-IR index. *D*: area under the curve (AUC)  
634 for OGTT. *E*: evolution of glycemia following oral glucose load. Significant differences are indicated  
635 as follows: comparison vs. Active group (\*: p<0.05), comparison vs. Inactive group (###: p<0.001)

636

637 **Figure 3. Effects of physical inactivity and myriocin treatment on muscle insulin signaling.** Data  
638 are presented as mean  $\pm$  SEM (n=7-8/group). *A*: Insulin-stimulated Akt activation in skeletal muscle of  
639 different experimental groups. *B*: muscle GLUT4 protein content muscle. *C*: GLUT4 mRNA levels. *D*:  
640 muscle AMPK activation. *E*: representative Western Blot of the data obtained in panel C and D.  
641 Significant differences are indicated as follows: comparison vs. Active group (\*: p<0.05), comparison  
642 vs. Inactive group (#: p<0.05, ##: p<0.01)

643

644 **Figure 4. Effects of physical inactivity and myriocin treatment on signaling pathways involved in**  
645 **muscle insulin resistance.** Data are presented as mean  $\pm$  SEM (n=7-8/group). *A*: IRS1<sup>Ser302</sup> activation.  
646 *B*: STAT3 activation. *C*:  $\kappa$ B $\alpha$  content. *D*: NF- $\kappa$ B p65 activation. *E*: representative Western Blot  
647 analyses of proteins involved in muscle insulin resistance.

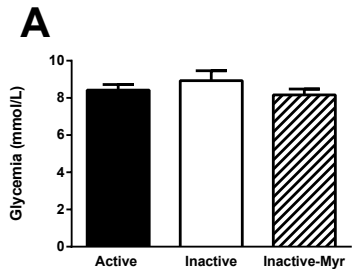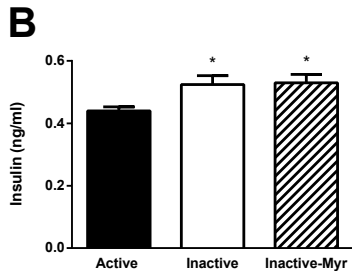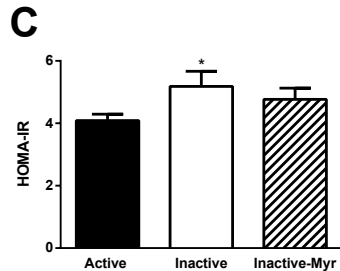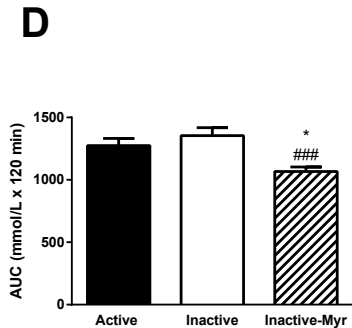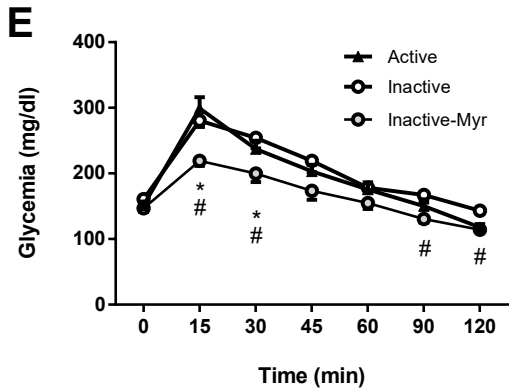

**A**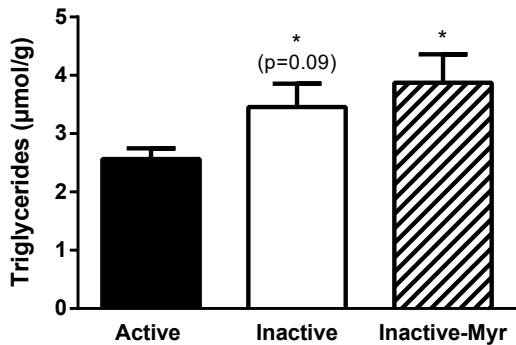**B**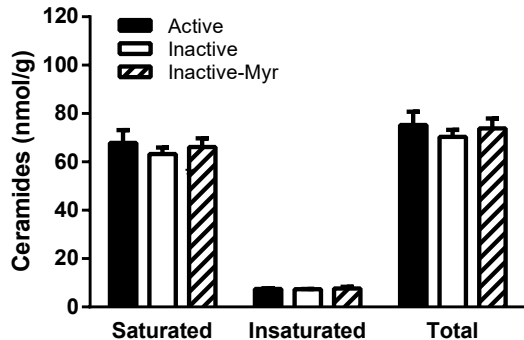**C**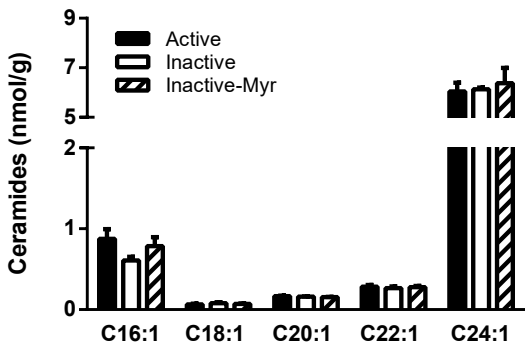**D**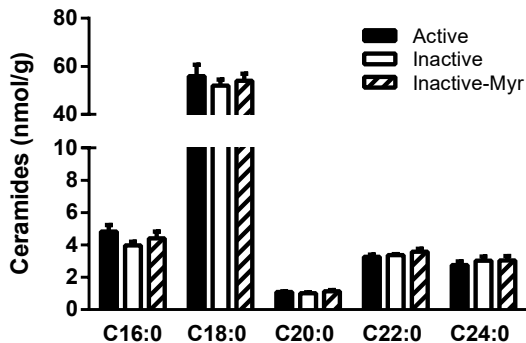

**A**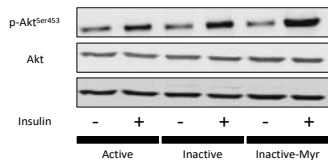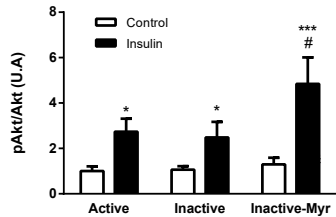**B**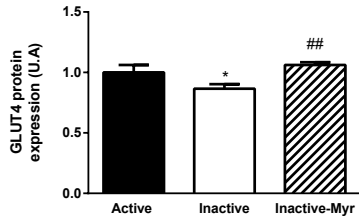**D**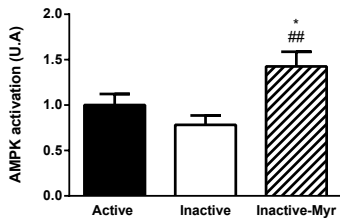**C**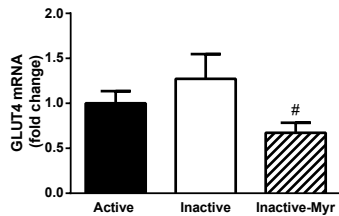**E**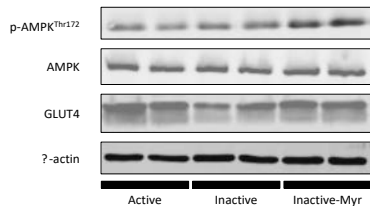

**A**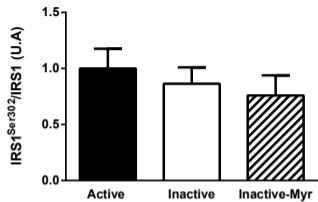**B**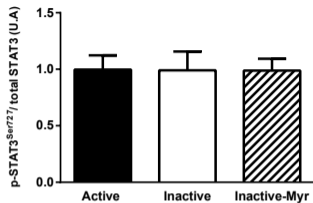**C**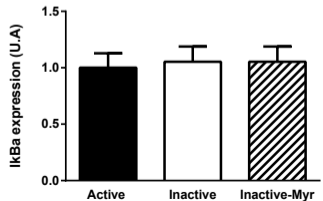**D**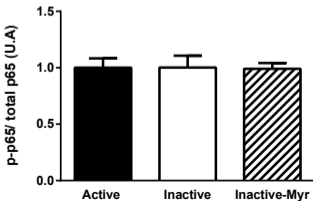**E**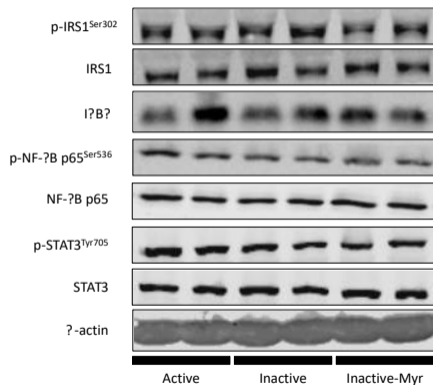

Source: https://www.biorxiv.org/content/10.1101/494559v1.full.pdf
